# Supplementary material
Source: PubMed Central journal article supplement (PMC2668039)
Supplement: mmc1.pdf [file mmc1.pdf]

## Supplemental Data

### A Recessive Skeletal Dysplasia, SEMD Aggrecan Type, Results from a Missense Mutation Affecting the C-Type Lectin Domain of Aggrecan

Stuart W. Tompson, Barry Merriman, Vincent A. Funari, Maryline Fresquet, Ralph S. Lachman, David L. Rimoin, Stanley F. Nelson, Michael D. Briggs, Daniel H. Cohn, and Deborah Krakow

**Table S1.** Primers used for PCR amplification and sequence analysis of the human ACAN gene (Primer Sequences shown 5'→3').

| Forward Primer                                  | Reverse Primer                                  |
|-------------------------------------------------|-------------------------------------------------|
| <b>ACAN_cDNA-1F</b><br>CTGAAGTTCTTGGAGAAGGGAGTC | <b>ACAN_cDNA-1R</b><br>ATTTCAGGGGCAAACGTGAAGGGC |
| <b>ACAN_cDNA-2F</b><br>TCCCGCTACGACGCCATCTGCTAC | <b>ACAN_cDNA-2R</b><br>AGAGCCCTCTAGGATCTCAGCTCC |
| <b>ACAN_cDNA-3F</b><br>ACCCTCTGGCCTGCCTGACTTTAG | <b>ACAN_cDNA-3R</b><br>GACAAGAAGAGGACACCGTCTG   |

#### cDNA PCR Primers

| Forward Primer                                  | Reverse Primer                                 |
|-------------------------------------------------|------------------------------------------------|
| <b>ACAN_VNTR-F</b><br>AGCTGGACTGAGCTGCCAGCTCTGG | <b>ACAN_VNTR-R</b><br>CTAGCTCTCCCACTAATGTCCAGC |

#### Genomic PCR Primers
